# Supplementary material for: Technical note: 21 Ne in the CoQtz-N quartz standard material
Source: Copernicus journal article supplement (doi:10.5194/gchron-7-247-2025), 2025-07-28
Supplement: Supplementary file 1 [file CoQtz-Table-S1.xlsx]

## Sheet: BGC CRONUS-A
Table S1a. Step-degassing Ne analyses on CRONUS-A at the Berkeley Geochronology Center.
				Heating	Heating																Excess 21Ne				Excess 21Ne as	Total			Total atmo-
		Analysis	Aliquot	temperature	time	Total 20Ne released			Total 21Ne released			Total 22Ne released			21Ne / 20Ne			22Ne / 20Ne			This heating step				% of 21Ne released	excess 21Ne			sphere 21Ne
Sample name	Aliquot	date	weight (g)	(deg C)	(hr)	(109 atoms)			(106 atoms)			(106 atoms)			(10-3)			(10-3)			(106 atoms g-1)				in this heating step	(106 atoms g-1)			(106 atoms g-1)
CRONUS-A	202108c	2021-08-20 10:30:48	0.1449	850	0.25	1.9412	+/-	0.0299	51.551	+/-	0.867	250.396	+/-	4.474	26.799	+/-	0.315	128.6	+/-	1.6	316.128	+/-	6.01451		88.8576	319.612	+/-	6.03441	41.4995
				1100	0.2	0.091	+/-	0.0088	0.774	+/-	0.066	8.965	+/-	1.116	8.535	+/-	1.093	98.1	+/-	15.4	3.48331	+/-	0.489655		65.2107
	202108d	2021-08-20 11:38:43	0.1457	850	0.25	2.1804	+/-	0.0334	51.59	+/-	0.822	276.003	+/-	4.785	23.869	+/-	0.248	126.1	+/-	1.4	309.802	+/-	5.68236		87.4941	314.353	+/-	5.70432	46.1823
				1100	0.2	0.0936	+/-	0.0079	0.94	+/-	0.069	11.597	+/-	1.115	10.068	+/-	1.11	123.4	+/-	15.6	4.5507	+/-	0.500015		70.5359
	202108e	2021-08-20 12:46:41	0.1412	850	0.25	2.1218	+/-	0.0351	51.133	+/-	0.786	270.398	+/-	4.462	24.298	+/-	0.294	127	+/-	1.6	317.667	+/-	5.61496		87.7214	322.022	+/-	5.64183	46.6818
				1100	0.2	0.1058	+/-	0.0068	0.928	+/-	0.075	12.071	+/-	1.085	8.795	+/-	0.891	113.6	+/-	12.4	4.35508	+/-	0.549945		66.2648
																									Mean	318.662
																									SD	3.92173

## Sheet: BGC CoQtz-N
Table S1b. Step-degassing Ne analyses on CoQtz-N at the Berkeley Geochronology Center.
				Heating	Heating																Excess 21Ne				Excess 21Ne as	Total			Total atmo-
		Analysis	Aliquot	temperature	time	Total 20Ne released			Total 21Ne released			Total 22Ne released			21Ne / 20Ne			22Ne / 20Ne			This heating step				% of 21Ne released	excess 21Ne			sphere 21Ne
Sample name	Aliquot	date	weight (g)	(deg C)	(hr)	(109 atoms)			(106 atoms)			(106 atoms)			(10-3)			(10-3)			(106 atoms g-1)				in this heating step	(106 atoms g-1)			(106 atoms g-1)
CoQtz-N	202108a	2021-08-20 13:54:45	0.1521	850	0.25	1.9561	+/-	0.0289	7.852	+/-	0.197	204.43	+/-	3.365	4.034	+/-	0.088	103.9	+/-	1	13.5694	+/-	1.41197		26.285	13.7879	+/-	1.50322	44.1477
				1100	0.2	0.3132	+/-	0.0088	0.96	+/-	0.074	31.755	+/-	1.382	3.07	+/-	0.244	100.9	+/-	4.8	0.218548	+/-	0.515764		3.46263
	202108b	2021-08-20 15:02:39	0.1486	850	0.25	1.8141	+/-	0.028	7.584	+/-	0.198	193.334	+/-	3.356	4.2	+/-	0.099	105.9	+/-	1.3	14.913	+/-	1.44439		29.2204	14.7762	+/-	1.53784	42.6128
				1100	0.2	0.3259	+/-	0.0088	0.944	+/-	0.074	35.737	+/-	1.375	2.9	+/-	0.235	109.1	+/-	4.6	-0.136865	+/-	0.527912
	202108c	2021-08-20 16:10:12	0.1394	850	0.25	1.6177	+/-	0.0239	6.471	+/-	0.209	167.52	+/-	2.731	4.017	+/-	0.12	102.9	+/-	1	12.082	+/-	1.58279		26.0273	12.4552	+/-	1.67077	40.0484
				1100	0.2	0.269	+/-	0.0087	0.848	+/-	0.07	28.543	+/-	1.246	3.155	+/-	0.273	105.6	+/-	5.3	0.373235	+/-	0.535033		6.1355
																									Mean	13.6731
																									SD	1.16474

## Sheet: LLNL CRONUS-A
Table S1c. Step-degassing Ne analyses on CRONUS-A at Lawrence Livermore National Laboratory.
				Heating	Heating																Excess 21Ne				Excess 21Ne as	Total			Total atmo-
		Analysis	Aliquot	temperature	time	Total 20Ne released			Total 21Ne released			Total 22Ne released			21Ne / 20Ne			22Ne / 20Ne			This heating step				% of 21Ne released	excess 21Ne			sphere 21Ne
Sample name	Aliquot	date	weight (g)	(deg C)	(min)	(109 atoms)			(106 atoms)			(106 atoms)			(10-3)			(10-3)			(106 atoms g-1)				in this heating step	(106 atoms g-1)			(106 atoms g-1)
CRONUS-A	202404d	2024-04-18 10:12:00	0.1279	450	13	0.594847	+/-	0.00228957	27.7214	+/-	0.318074	89.8214	+/-	0.343963	46.6025	+/-	0.563999	150.999	+/-	0.819847	202.981	+/-	2.48746		93.6506	319.692	+/-	2.99621	42.5402
				850	14	1.17296	+/-	0.0042991	18.0347	+/-	0.211609	135.172	+/-	0.453246	15.3754	+/-	0.189002	115.24	+/-	0.572463	113.87	+/-	1.65747		80.7549
				1100	10	0.0709501	+/-	0.000746134	0.57336	+/-	0.0263212	7.57142	+/-	0.267439	8.08117	+/-	0.380591	106.715	+/-	3.93291	2.84143	+/-	0.206518		63.384
	202404e	2024-04-18 13:13:00	0.125	450	14	0.495779	+/-	0.00195934	27.6245	+/-	0.314551	79.7561	+/-	0.377338	55.7194	+/-	0.671586	160.87	+/-	0.991703	209.26	+/-	2.51684		94.6895	319.565	+/-	3.00044	43.8936
				850	15	1.28656	+/-	0.00478343	17.2422	+/-	0.201834	145.564	+/-	0.548615	13.4018	+/-	0.164602	113.142	+/-	0.598991	107.482	+/-	1.61864		77.9208
				1100	12	0.0719012	+/-	0.000767621	0.565611	+/-	0.0273427	7.70967	+/-	0.394069	7.8665	+/-	0.389445	107.226	+/-	5.59899	2.82284	+/-	0.219495		62.3848
	202404f	2024-04-18 14:23:00	0.1325	450	14	0.813412	+/-	0.00305657	36.6154	+/-	0.410185	120.643	+/-	0.418991	45.0146	+/-	0.53189	148.317	+/-	0.758913	258.178	+/-	3.09648		93.4266	325.916	+/-	3.28143	40.5345
				850	15	0.933438	+/-	0.00366242	11.2541	+/-	0.140632	103.911	+/-	0.623114	12.0566	+/-	0.157912	111.321	+/-	0.797742	64.091	+/-	1.06452		75.4574
				1100	12	0.0682291	+/-	0.00121083	0.685197	+/-	0.0283026	7.54588	+/-	0.588771	10.0426	+/-	0.451482	110.596	+/-	8.84971	3.6476	+/-	0.215309		70.5355
	202404a	2024-04-23 14:30:00	0.1238	450	15	0.58516	+/-	0.00214427	24.8506	+/-	0.284875	85.5681	+/-	0.313847	42.468	+/-	0.5111	146.23	+/-	0.758153	186.746	+/-	2.30166		93.0324	320.711	+/-	2.9799	47.8995
				850	15	1.3394	+/-	0.00481249	20.0601	+/-	0.232919	154.37	+/-	0.418286	14.977	+/-	0.182035	115.253	+/-	0.518665	130.023	+/-	1.88493		80.243
				1100	12	0.0794832	+/-	0.000378043	0.723239	+/-	0.0211345	8.45466	+/-	0.270169	9.09927	+/-	0.269398	106.37	+/-	3.43651	3.94223	+/-	0.170953		67.4809
	202404b	2024-04-23 15:27:00	0.1013	450	15	0.37954	+/-	0.00141072	23.2919	+/-	0.269464	63.7204	+/-	0.291479	61.3689	+/-	0.74572	167.889	+/-	0.989551	218.844	+/-	2.66038		95.1783	319.084	+/-	3.06881	39.0459
				850	15	0.917588	+/-	0.00333396	12.6543	+/-	0.153929	104.439	+/-	0.343083	13.7908	+/-	0.175078	113.82	+/-	0.557515	98.1156	+/-	1.52266		78.5436
				1100	12	0.0395919	+/-	0.000381477	0.332339	+/-	0.0148117	4.2401	+/-	0.424979	8.39413	+/-	0.382753	107.095	+/-	10.7835	2.12425	+/-	0.14664		64.7492
	202404c	2024-04-23 16:36:00	0.0777	450	15	0.313582	+/-	0.00117913	18.2109	+/-	0.21108	51.1278	+/-	0.273515	58.0736	+/-	0.70766	163.044	+/-	1.06613	222.432	+/-	2.71698		94.9047	326.009	+/-	3.15641	42.1292
				850	15	0.746575	+/-	0.00271225	9.93319	+/-	0.123108	84.3089	+/-	0.337183	13.305	+/-	0.171836	112.928	+/-	0.610156	99.409	+/-	1.58777		77.7603
				1100	12	0.0461083	+/-	0.0010303	0.460291	+/-	0.0187832	5.06875	+/-	0.619592	9.98281	+/-	0.464448	109.931	+/-	13.6604	4.16803	+/-	0.244904		70.3591
	202411a	2024-11-26 10:40:00	0.1197	450	15	0.617214	+/-	0.00665735	24.9298	+/-	0.402523	88.7647	+/-	0.903498	40.3909	+/-	0.784293	143.815	+/-	2.13285	193.012	+/-	3.36679		92.6741	319.671	+/-	4.22434	48.431
				850	15	1.26278	+/-	0.00891169	18.3694	+/-	0.300638	144.683	+/-	1.1985	14.5467	+/-	0.259266	114.575	+/-	1.24682	122.245	+/-	2.52124		79.6586
				1100	10	0.0791749	+/-	0.00757582	0.762602	+/-	0.0411241	9.64259	+/-	1.16592	9.63185	+/-	1.05791	121.788	+/-	18.779	4.41372	+/-	0.391287		69.279
	202412a	2024-12-03 09:00:00	0.1307	450	15	0.745166	+/-	0.0095017	25.8457	+/-	0.444792	102.678	+/-	1.13686	34.6845	+/-	0.742895	137.792	+/-	2.32694	180.878	+/-	3.40995		91.4688	312.026	+/-	4.8378	53.4478
				850	15	1.52696	+/-	0.0128656	21.02	+/-	0.445321	174.535	+/-	1.7022	13.7659	+/-	0.313856	114.302	+/-	1.47316	126.256	+/-	3.41962		78.5048
				1100	10	0.0886766	+/-	0.0090702	0.901737	+/-	0.0263388	10.576	+/-	1.09283	10.1688	+/-	1.08169	119.265	+/-	17.3404	4.89168	+/-	0.287711		70.9012
	202412b	2024-12-09 09:34:00	0.0987	450	15	0.44215	+/-	0.00237851	18.3958	+/-	0.222792	64.0198	+/-	0.422513	41.6053	+/-	0.551353	144.792	+/-	1.23281	173.125	+/-	2.25839		92.8879	320.323	+/-	3.13842	47.9209
				850	15	1.09459	+/-	0.00573096	17.207	+/-	0.21337	127.247	+/-	0.748776	15.72	+/-	0.211595	116.251	+/-	0.915651	141.521	+/-	2.16862		81.1769
				1100	10	0.0617038	+/-	0.000633946	0.742964	+/-	0.0211785	7.15049	+/-	0.223409	12.0408	+/-	0.364841	115.884	+/-	3.81139	5.67763	+/-	0.215414		75.4253
	202412c	2024-12-16 11:01:00	0.1064	450	15	0.202539	+/-	0.000612899	12.2228	+/-	0.114742	33.9384	+/-	0.288661	60.3478	+/-	0.595228	167.565	+/-	1.51273	109.243	+/-	1.07854		95.0968	320.087	+/-	2.90053	48.543
				850	15	1.47589	+/-	0.00384911	26.4005	+/-	0.284258	175.68	+/-	1.12981	17.8878	+/-	0.198171	119.033	+/-	0.826064	207.08	+/-	2.67375		83.458
				1100	10	0.0670843	+/-	0.00116328	0.598986	+/-	0.0336214	7.49833	+/-	0.514624	8.92885	+/-	0.524553	111.775	+/-	7.91237	3.76394	+/-	0.317642		66.8602
	202412e	2024-12-21 09:45:00	0.0578	450	15	0.288749	+/-	0.00286724	11.1572	+/-	0.135261	41.3091	+/-	0.446289	38.6398	+/-	0.605515	143.062	+/-	2.09927	178.249	+/-	2.34475		92.3421	316.654	+/-	3.24111	48.0022
				850	15	0.60832	+/-	0.00544036	9.5017	+/-	0.120643	71.2936	+/-	0.665823	15.6196	+/-	0.242579	117.197	+/-	1.51544	133.247	+/-	2.10574		81.0558
				1100	10	0.040587	+/-	0.00243134	0.418198	+/-	0.0431495	4.22865	+/-	0.442591	10.3038	+/-	1.22933	104.187	+/-	12.5645	5.15746	+/-	0.756837		71.2823
																									Mean	319.976
																									SD	3.84369

## Sheet: LLNL CoQtz-N
Table S1d. Step-degassing Ne analyses on CoQtz-N at Lawrence Livermore National Laboratory.
				Heating	Heating																Excess 21Ne				Excess 21Ne as	Total			Total atmo-
		Analysis	Aliquot	temperature	time	Total 20Ne released			Total 21Ne released			Total 22Ne released			21Ne / 20Ne			22Ne / 20Ne			This heating step				% of 21Ne released	excess 21Ne			sphere 21Ne
Sample name	Aliquot	date	weight (g)	(deg C)	(min)	(109 atoms)			(106 atoms)			(106 atoms)			(10-3)			(10-3)			(106 atoms g-1)				in this heating step	(106 atoms g-1)			(106 atoms g-1)
CoQtz-N	202405a	2024-05-08 13:35:00	0.1243	450	15	0.672252	+/-	0.00598986	3.22036	+/-	0.0769911	69.8141	+/-	0.635002	4.79041	+/-	0.122222	103.851	+/-	1.3223	9.90482	+/-	0.635598		38.2308	13.1122	+/-	1.01044	49.458
				850	15	1.07081	+/-	0.00929916	3.52769	+/-	0.0817199	108.754	+/-	0.718131	3.29441	+/-	0.0815021	101.562	+/-	1.108	2.88945	+/-	0.693709		10.1811
				1100	12	0.334541	+/-	0.00319747	1.02942	+/-	0.0448138	34.3259	+/-	0.640462	3.07713	+/-	0.137147	102.606	+/-	2.15102	0.317923	+/-	0.368477		3.83883
	202405b	2024-05-15 13:51:00	0.1236	450	15	0.651117	+/-	0.00592909	3.19923	+/-	0.0740763	67.4894	+/-	0.604093	4.91344	+/-	0.12225	103.652	+/-	1.32349	10.2959	+/-	0.615902		39.7775	13.4978	+/-	0.95137	44.9547
				850	15	0.968662	+/-	0.00851366	3.19571	+/-	0.0764451	98.6274	+/-	0.650501	3.29909	+/-	0.0840764	101.818	+/-	1.11884	2.66532	+/-	0.651206		10.3086
				1100	12	0.258016	+/-	0.00270257	0.829791	+/-	0.0385968	26.7791	+/-	0.525455	3.21604	+/-	0.153336	103.788	+/-	2.30852	0.536576	+/-	0.318904		7.99247
	202412a	12/16/2024 16_09	0.1431	450	15	0.969543	+/-	0.00272458	4.34137	+/-	0.078902	100.741	+/-	0.721742	4.47775	+/-	0.0823476	103.906	+/-	0.799632	10.2899	+/-	0.554247		33.9177	12.6597	+/-	0.769151	53.3085
				850	15	1.29096	+/-	0.0058472	4.13443	+/-	0.063421	131.386	+/-	0.842296	3.20259	+/-	0.0512237	101.774	+/-	0.798867	2.19754	+/-	0.45939		7.60609
				1100	10	0.317545	+/-	0.00230189	0.964259	+/-	0.0381565	32.732	+/-	0.645217	3.03661	+/-	0.12216	103.078	+/-	2.16493	0.17221	+/-	0.270857		2.55567
	202412b	2024-12-16 17:14:00	0.1314	450	15	0.795008	+/-	0.00231246	3.94069	+/-	0.0785233	83.7541	+/-	0.668201	4.9568	+/-	0.0998173	105.35	+/-	0.894615	12.0873	+/-	0.599854		40.3042	14.5086	+/-	0.770985	46.5338
				850	15	1.02678	+/-	0.00473676	3.32163	+/-	0.0528537	103.823	+/-	0.730195	3.23499	+/-	0.0535948	101.115	+/-	0.850483	2.15664	+/-	0.416139		8.53144
				1100	10	0.244631	+/-	0.00216188	0.758639	+/-	0.0319306	25.0003	+/-	0.682643	3.10115	+/-	0.133372	102.196	+/-	2.93301	0.264648	+/-	0.247832		4.58384
	202412c	2024-12-17 09:01:00	0.1337	450	15	0.705274	+/-	0.00207382	3.49423	+/-	0.0967782	74.0675	+/-	0.586745	4.95443	+/-	0.137992	105.019	+/-	0.887402	10.526	+/-	0.725299		40.2756	12.6792	+/-	0.892047	41.7614
				850	15	0.987155	+/-	0.00459322	3.17457	+/-	0.0525103	100.653	+/-	0.737857	3.21588	+/-	0.0552581	101.963	+/-	0.885312	1.89663	+/-	0.40569		7.98782
				1100	10	0.194525	+/-	0.00169956	0.609905	+/-	0.0430526	19.5318	+/-	0.604445	3.13536	+/-	0.223011	100.407	+/-	3.22875	0.256586	+/-	0.324199		5.62473
	202412d	2024-12-17 10:05:00	0.1488	450	15	0.898214	+/-	0.00252909	4.48667	+/-	0.069365	94.7528	+/-	0.698318	4.9951	+/-	0.0784958	105.49	+/-	0.832259	12.2907	+/-	0.468868		40.7619	14.3887	+/-	0.678448	43.2813
				850	15	1.05408	+/-	0.00488382	3.39384	+/-	0.0554691	106.465	+/-	0.769118	3.21972	+/-	0.0546968	101.003	+/-	0.866831	1.84688	+/-	0.38522		8.09748
				1100	10	0.224201	+/-	0.001925	0.700783	+/-	0.0447874	22.6755	+/-	0.643368	3.12569	+/-	0.201559	101.139	+/-	2.99811	0.251153	+/-	0.303415		5.33282
	202412e	2024-12-17 11:59:00	0.1347	450	15	0.786466	+/-	0.00238379	3.85352	+/-	0.0610169	82.9703	+/-	0.667849	4.89979	+/-	0.0789924	105.498	+/-	0.907387	11.3316	+/-	0.456001		39.6096	13.8299	+/-	0.671608	43.5309
				850	15	0.969543	+/-	0.00452013	3.1552	+/-	0.0527481	97.923	+/-	0.719364	3.25431	+/-	0.056481	100.999	+/-	0.878764	2.12561	+/-	0.403989		9.07455
				1100	10	0.22561	+/-	0.0019338	0.717779	+/-	0.0376457	22.7812	+/-	0.659835	3.1815	+/-	0.169075	100.976	+/-	3.05005	0.372665	+/-	0.282689		6.99352
	202412i	2024-12-21 15:03:00	0.1309	450	15	0.785673	+/-	0.00691977	3.83943	+/-	0.068502	82.4772	+/-	0.783208	4.8868	+/-	0.0972336	104.976	+/-	1.35962	11.5708	+/-	0.546193		39.4491	14.0136	+/-	0.914782	44.3228
				850	15	0.932558	+/-	0.00811827	2.9826	+/-	0.0823891	95.6334	+/-	0.837277	3.1983	+/-	0.0926309	102.55	+/-	1.26612	1.70482	+/-	0.655613		7.48211
				1100	10	0.242518	+/-	0.00337711	0.814205	+/-	0.0419783	24.4895	+/-	0.586481	3.3573	+/-	0.179296	100.98	+/-	2.79741	0.737926	+/-	0.329651		11.8637
	202412j	2024-12-21 16:08:00	0.113	450	15	0.732837	+/-	0.00650941	3.45812	+/-	0.058199	78.2591	+/-	0.69321	4.71882	+/-	0.0897984	106.789	+/-	1.3396	11.4129	+/-	0.542509		37.2936	14.9055	+/-	0.983147	49.0356
				850	15	0.925513	+/-	0.00821778	3.0645	+/-	0.0814733	94.5767	+/-	0.84529	3.31113	+/-	0.0928102	102.188	+/-	1.28741	2.8841	+/-	0.75243		10.6348
				1100	10	0.214251	+/-	0.00329169	0.702721	+/-	0.0354971	21.4603	+/-	0.635619	3.2799	+/-	0.173174	100.164	+/-	3.34209	0.608436	+/-	0.325745		9.78387
	202412k	2024-12-21 17:12:00	0.1433	450	15	0.689159	+/-	0.00613604	3.73904	+/-	0.0639493	73.5567	+/-	0.758022	5.4255	+/-	0.104614	106.734	+/-	1.4536	11.8619	+/-	0.4639		45.4613	14.5464	+/-	0.676715	36.9126
				850	15	0.904378	+/-	0.00814557	2.9782	+/-	0.057653	92.111	+/-	0.795272	3.29309	+/-	0.070311	101.85	+/-	1.27074	2.10845	+/-	0.436068		10.1451
				1100	10	0.194085	+/-	0.00296675	0.656841	+/-	0.0316665	19.6903	+/-	0.538576	3.3843	+/-	0.171163	101.452	+/-	3.17888	0.576026	+/-	0.229314		12.5669
																									Mean	13.8141
																									SD	0.802302

## Sheet: statistics
Summary data for CoQtz-N
							Error-weighting
Lab	N21 (Mat/g)	+/-		SWD			Wi	WiXi			pct err
BGC	13.7879	1.50322		1.76767e-05			0.442545	6.10177			10.9024
BGC	14.7762	1.53784		0.418278			0.422844	6.24802			10.4075
BGC	12.4552	1.67077		0.630245			0.358233	4.46186			13.4143
LLNL	13.1122	1.01044		0.438874			0.979439	12.8426			7.70612
LLNL	13.4978	0.95137		0.0889923			1.10485	14.913			7.04834
LLNL	12.6597	0.769151		2.12755			1.69035	21.3994			6.07558
LLNL	14.5086	0.770985		0.889085			1.68232	24.408			5.314
LLNL	12.6792	0.892047		1.52723			1.25668	15.9337			7.03552
LLNL	14.3887	0.678448		0.800772			2.17253	31.2599			4.71515
LLNL	13.8299	0.671608		0.00516328			2.21702	30.661			4.85622
LLNL	14.0136	0.914782		0.0642987			1.19499	16.7461			6.52783
LLNL	14.9055	0.983147		1.30674			1.03458	15.4209			6.59589
LLNL	14.5464	0.676715		1.27732			2.18368	31.7646			4.65211
Mean	13.7816		MSWD	0.797881		Error-weighted mean		13.8686
SD	0.844213					Standard error		0.244411
						Chi-squared		9.57457
						DOF		12
						Reduced chi-squared		0.797881	(note: this is the same as the MSWD for 1 estimated parameter)
						p(chi-squared)		0.653228
Summary data for CRONUS-A
							Error-weighting
Lab	N21 (Mat/g)	+/-		SWD			Wi	WiXi
BGC	319.612	6.03441		0.000189037			0.0274619	8.77714
BGC	314.353	5.70432		0.876854			0.0307321	9.66074
BGC	322.022	5.64183		0.170209			0.0314167	10.1169
LLNL	319.692	2.99621		9.35845e-07			0.111392	35.6111
LLNL	319.565	3.00044		0.00187083			0.111079	35.4968
LLNL	325.916	3.28143		3.59501			0.0928696	30.2677
LLNL	320.711	2.9799		0.116307			0.112615	36.1168
LLNL	319.084	3.06881		0.039633			0.106184	33.8816
LLNL	326.009	3.15641		4.00203			0.100372	32.7221
LLNL	319.671	4.22434		3.10539e-05			0.056038	17.9137
LLNL	312.026	4.8378		2.51284			0.0427271	13.332
LLNL	320.323	3.13842		0.040148			0.101526	32.5213
LLNL	320.087	2.90053		0.0182814			0.118863	38.0464
LLNL	316.654	3.24111		0.880081			0.0951948	30.1438
Mean	319.695		MSWD	0.942576		Error-weighted mean		320.261		Error-weighted mean (LLNL only)			320.399
SD	3.74749					Standard error		0.937215		Standard error (LLNL only)			0.97643
						Chi-squared		12.2535		Chi-squared (LLNL only)			11.2062
						DOF		13		DOF			10
						Reduced chi-squared		0.942576		Reduced chi-squared			1.12062
						p(chi-squared)		0.506976		p(chi-squared)			0.341678
Ratio of excess Ne-21 in CoQtz-N to CRONUS-A				0.043304	+/-	0.000773613
