# Supplementary material for: Technical note: 21 Ne in the CoQtz-N quartz standard material
Source: Copernicus journal article supplement (doi:10.5194/gchron-7-247-2025), 2025-07-28
Supplement: Supplementary file [file gchron-7-247-2025-supplement-title-page.pdf › gchron-7-247-2025-supplement-title-page.pdf]

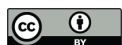

## *Supplement of*

## **Technical note: $^{21}\text{Ne}$ in the CoQtz-N quartz standard material**

**Greg Balco**

*Correspondence to:* Greg Balco (balco1@llnl.gov)

- gchron-7-247-2025-supplement-title-page.pdf
- CoQtz-Table-S1.xlsx

The copyright of individual parts of the supplement might differ from the article licence.
